# Supplementary material
Source: Research Square preprint supplement (doi:10.21203/rs.3.rs-9986871/v1)
Supplement: Supplementary file 1 [file fbc06af2721610758430ea67.docx]

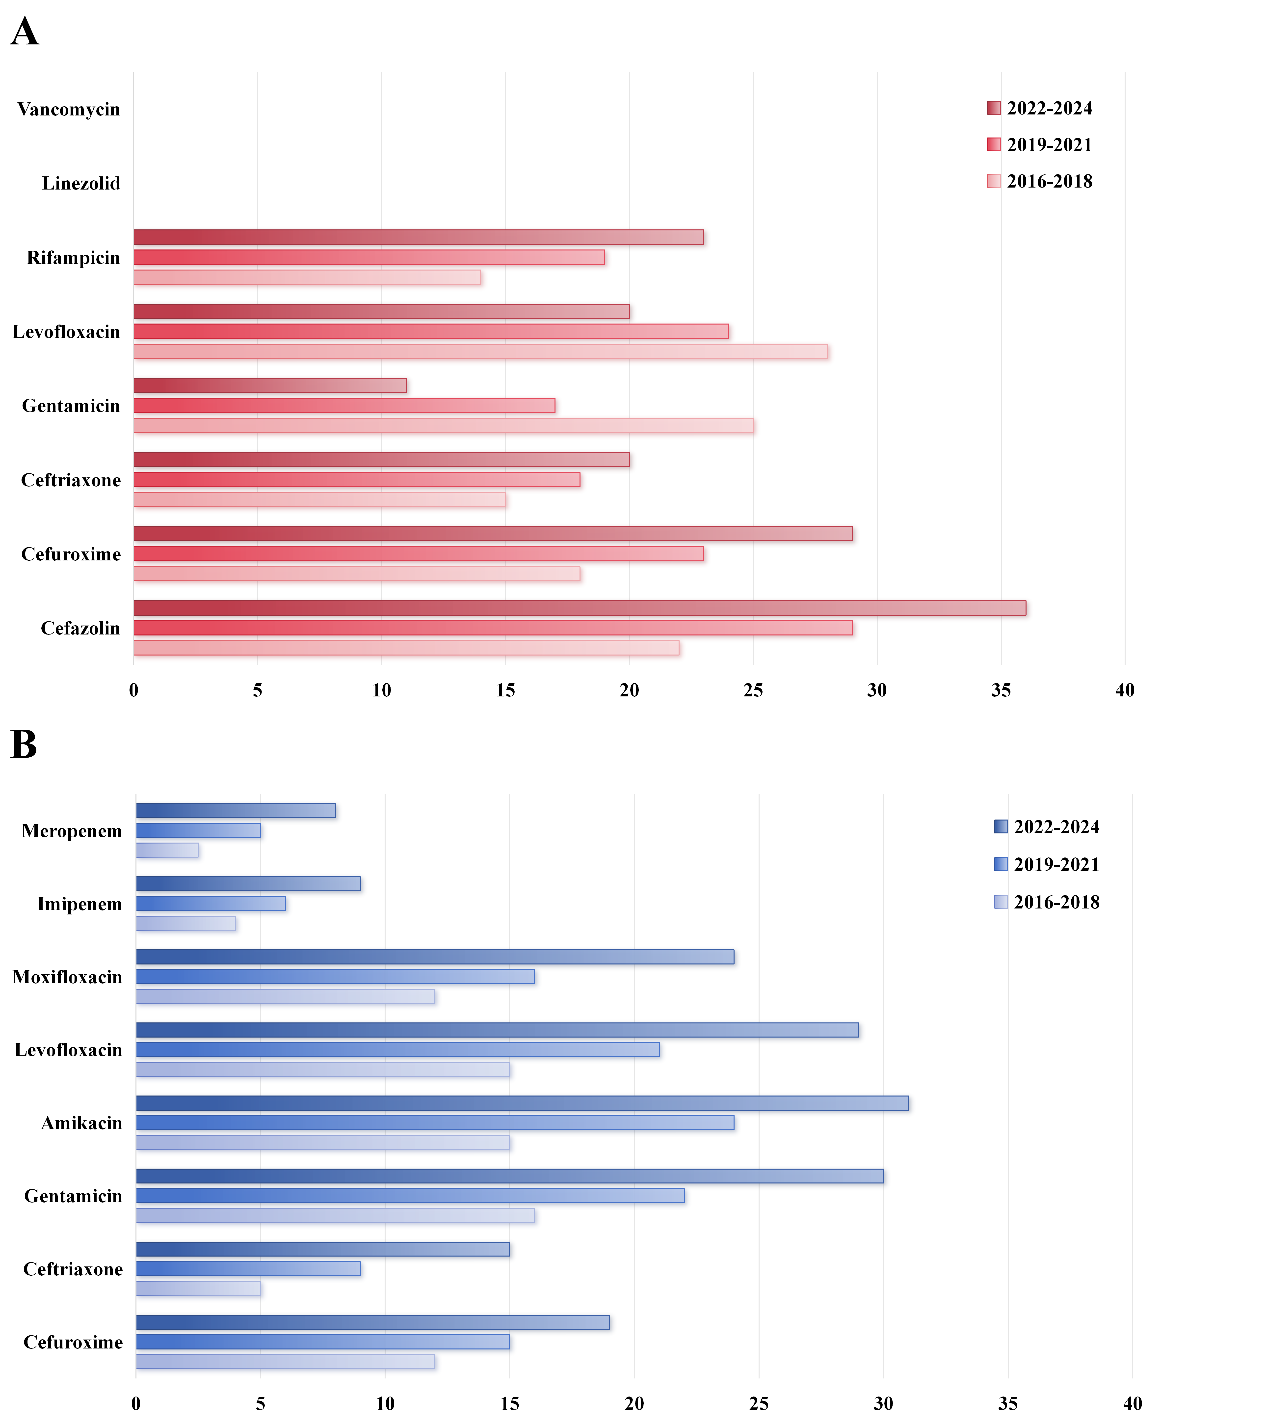
**Figures S1 Variations in the Resistance Rates of Gram-Positive and Gram-Negative Bacteria to Common Antibiotics**

**A** depicts the changes in resistance rates for Gram-positive bacteria, while **B** illustrates the changes for Gram-negative bacteria.
